# Supplementary material
Source: HighWire-hosted journal article supplement (http://www.qdcxjkg.com/highwire/filestream/130681/field_highwire_adjunct_files/0/ERJ-01711-2015_Table_S1.pdf)
Supplement: ERJ-01711-2015_Table_S1.pdf [file ERJ-01711-2015_Table_S1.pdf]

**TABLE S1** Reference equations applied in this study for Caucasian populations

| Parameter                 | Prediction equations                                              | Age range                                                           |                                      |
|---------------------------|-------------------------------------------------------------------|---------------------------------------------------------------------|--------------------------------------|
| <b>Males Caucasians</b>   |                                                                   |                                                                     |                                      |
| <b>FEV1</b>               | NHANESIII                                                         | $-0.7453-0.04106*A+0.004477*A^2+0.00014098*H^2$                     | < 20 years of age                    |
|                           |                                                                   | $0.5536-0.01303*A-0.000172*A^2+0.00014098*H^2$                      | $\geq 20$ years of age               |
|                           | ERS/GLI12                                                         | $\exp(-10.3420 + 2.2196*\ln(H) + 0.0574*\ln(A) + \text{Mspline})$   | $3 \leq \text{years of age} \leq 95$ |
| <b>FEV1/FVC<br/>LLN</b>   | NHANESIII                                                         | $(-0.2066*A+78.388)/100;$                                           | $8 \leq \text{years of age} \leq 80$ |
|                           | ERS/GLI12                                                         | $L = 4.7101-0.6774*\ln(A)+\text{Lspline}$                           | $3 \leq \text{years of age} \leq 95$ |
|                           |                                                                   | $M = \exp(0.7403-0.1595*\ln(H)-0.0366*\ln(A)+\text{Mspline})$       |                                      |
|                           |                                                                   | $S = \exp(-2.95950.1156*\ln(A)+\text{Sspline})$                     |                                      |
|                           | $\text{LLN}(\text{FEV1/FVC}) = \exp(\ln(1 - 1.645*L*S)/L+\ln(M))$ |                                                                     |                                      |
| <b>Females Caucasians</b> |                                                                   |                                                                     |                                      |
| <b>FEV1</b>               | NHANESIII                                                         | $-0.8710+0.06537*A+0.00011496*H^2$                                  | <18 years of age                     |
|                           |                                                                   | $0.4333-0.00361*A-0.000194*A^2+0.00011496*H^2$                      | $\geq 18$ years of age               |
|                           | ERS/GLI12                                                         | $\exp(-9.6987 + 2.1211*\ln(H) - 0.0270*\ln(A) + \text{Mspline})$    | $3 \leq \text{years of age} \leq 95$ |
| <b>FEV1/FVC<br/>LLN</b>   | NHANESIII                                                         | $(-0.2125*A+81.015)/100;$                                           | $8 \leq \text{years of age} \leq 80$ |
|                           | ERS/GLI12                                                         | $L = 7.032-1.197*\ln(A)+\text{Lspline}$                             | $3 \leq \text{years of age} \leq 95$ |
|                           |                                                                   | $M = \exp(0.55067403-0.1078*\ln(H) - 0.0544*\ln(A)+\text{Mspline})$ |                                      |
|                           |                                                                   | $S = \exp(-3.2395 + 0.1850*\ln(A)+\text{Sspline})$                  |                                      |
|                           | $\text{LLN}(\text{FEV1/FVC}) = \exp(\ln(1 - 1.645*L*S)/L+\ln(M))$ |                                                                     |                                      |

Lspline, Spline, Mspline, and coefficients for the GLI12 spirometric predictions were obtained from the LookUpTables (<http://www.lungfunction.org>)

**Abbreviations:** FEV1 = forced expiratory volume in one second; FEV1/FVC ratio; H = Height, centimetres; A = Age, years. LLN = Lower Limit of Normal, NHANESIII = National Health and Nutritional Examination Survey III (2). ERS/GLI12 = European Respiratory Society-Global Lung Function Initiative 2012.
